# Supplementary material for: Human nucleolar protein Nop52 (RRP1/NNP-1) is involved in site 2 cleavage in internal transcribed spacer 1 of pre-rRNAs at early stages of ribosome biogenesis
Source: PubMed Central journal article supplement (PMC4477673; doi:10.1093/nar/gkv470), 2015-05-12
Supplement: supp_gkv470_nar-00089-r-2015-File003.pdf [file supp_gkv470_nar-00089-r-2015-File003.pdf]

## Supplementary Materials

### **Human nucleolar protein Nop52 (RRP1/NNP-1) is involved in site 2 cleavage in internal transcribed spacer 1 of pre-rRNAs at early stages of ribosome biogenesis**

Harunori Yoshikawa<sup>1,2</sup>, Hideaki Ishikawa<sup>1,3</sup>, Keiichi Izumikawa<sup>1,3</sup>, Yutaka Miura<sup>1</sup>, Toshiya Hayano<sup>1</sup>, Toshiaki Isobe<sup>3,4</sup>, Richard J Simpson<sup>5</sup> and Nobuhiro Takahashi<sup>1,3,\*</sup>

<sup>1</sup>Department of Applied Life Science, Graduate School of Agriculture, Tokyo University of Agriculture and Technology, 3-5-8 Saiwai-cho, Fuchu-shi, Tokyo, 183-8509, Japan

<sup>2</sup>Centre for Gene Regulation & Expression, College of Life Sciences, University of Dundee, Dow Street, Dundee, DD1 5EH, UK

<sup>3</sup>Core Research for Evolutional Science and Technology (CREST), Japan Science and Technology Agency (JST), Sanbancho 5, Chiyoda-ku, Tokyo, 102-0075, Japan

<sup>4</sup>Department of Chemistry, Graduate School of Sciences and Engineering, Tokyo Metropolitan University, 1-1 Minamiosawa, Hachioji-shi, Tokyo 192-0397, Japan

<sup>5</sup>La Trobe Institute for Molecular Science (LIMS) LIMS Building 1, Room 412 La Trobe University, Bundoora Victoria 3086, Australia

\*To whom correspondence should be addressed. Tel: +81-(0)42-367-5709; Fax: +81-(0)42-367-5709; Email: ntakahas@cc.tuat.ac.jp

Present Address: [Toshiya Hayano], Department of Biomedical Sciences, College of Life Sciences, Ritsumeikan University, 1-1-1 Nojihigashi, Kusatsu-shi, 525-8577, Japan

**Supplementary Figure 1**

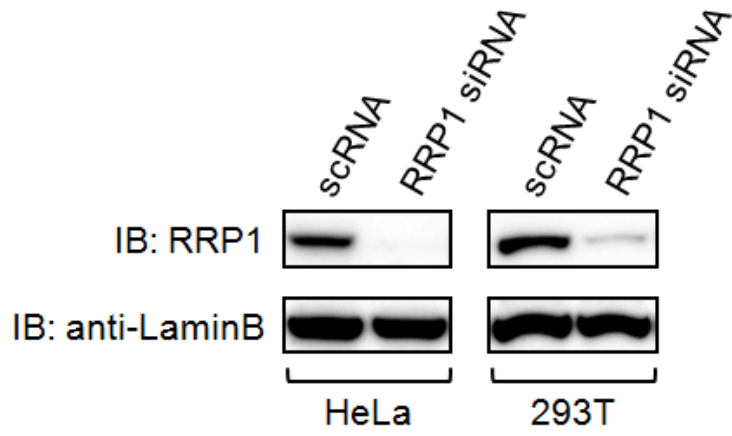

Total protein from HeLa or 293T cells (20  $\mu$ g/lane) treated with scRNA or RRP1 siRNA was analyzed by immunoblotting (IB) with anti-RRP1 or anti-LaminB.

**Supplementary Figure 2**

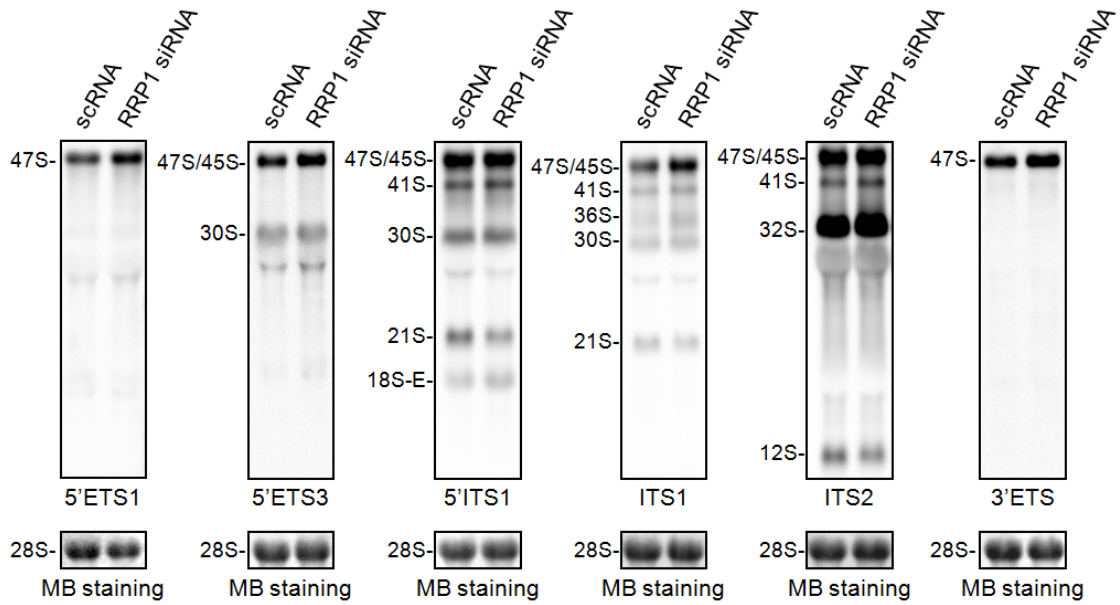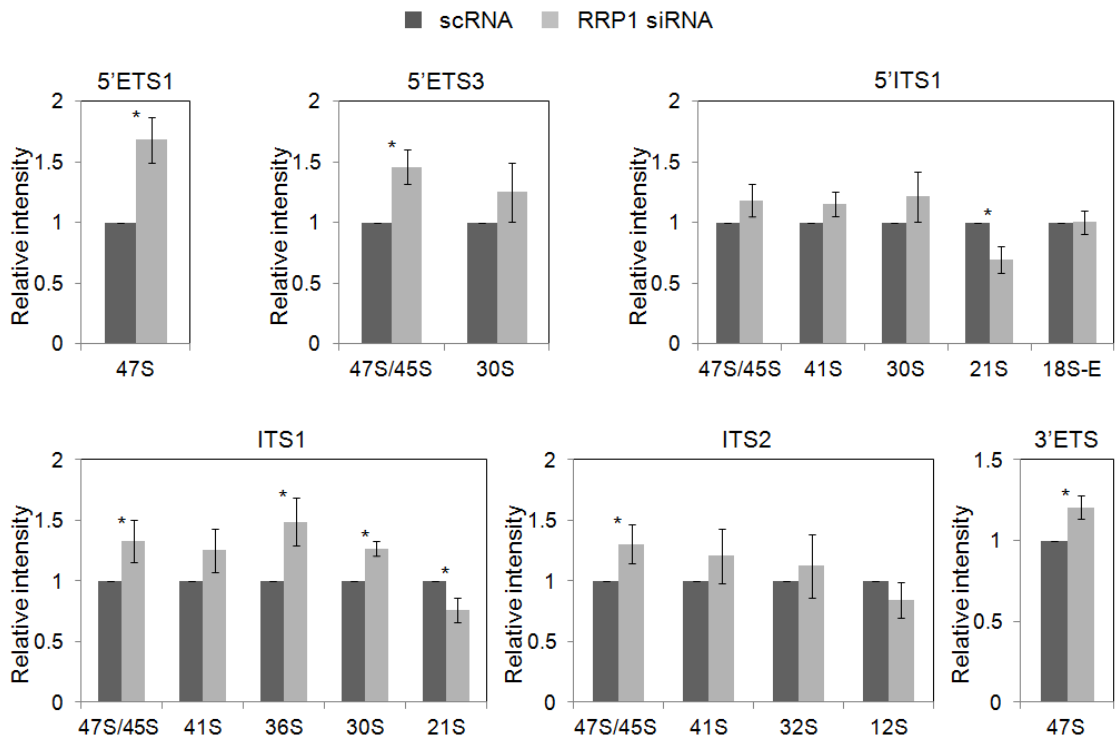

Pre-rRNA intermediates isolated from 293T cells treated with scRNA or RRP1 siRNA were detected by northern blot analysis (top) and quantified (bottom) as in Figure.3B and C.

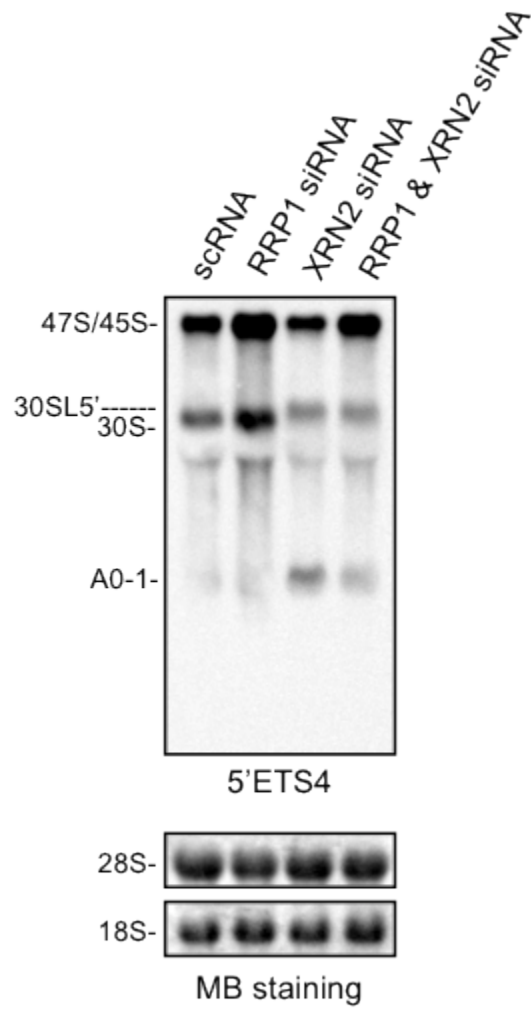

The A0-1 fragment was detected by northern blot analysis with 5'ETS4 probe (Figure. 3A) in XRN2-depleted cells and in RRP1-XRN2-co-depleted cells.

Supplementary

Figure 4

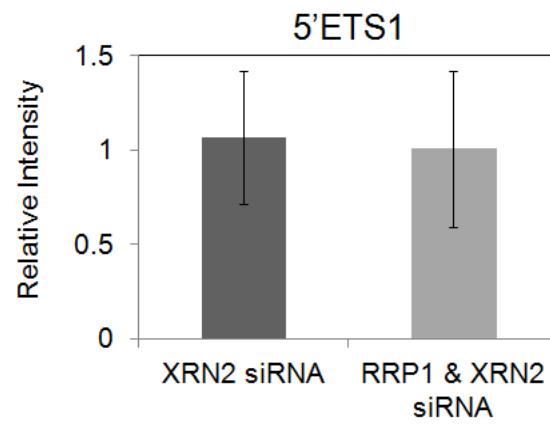

The ratio of the 30SL5' pre-rRNA and 5'-01 fragment detected by 5'ETS1 probe (Figure 4B) are shown for XRN2-depleted cells and RRP1-XRN2-co-depleted cells. The intensities of 30SL5' and 5'-01 were quantified, and normalized to the amount of 28S rRNA. The values are average ( $\pm$  SD) of three independent experiments.
